# Supplementary material for: An Overview of Clinical Manifestations of Dermatological Disorders in Intensive Care Units: What Should Intensivists Be Aware of?
Source: MDPI journal article supplement (doi:10.3390/diagnostics13071290), 2023-03-29
Supplement: s1 [file s1]

**Table S1. Classification of Dermatological Manifestations(DM) in Intensive Medicine**

| GROUP                                                                                           |                                                                                                                                                                                                                                                                                |
|-------------------------------------------------------------------------------------------------|--------------------------------------------------------------------------------------------------------------------------------------------------------------------------------------------------------------------------------------------------------------------------------|
| <b>Group 1.</b><br><br><b>DMs of life-threatening skin diseases that require ICU admission.</b> | 1.1.Pemphigus Vulgaris (PV)                                                                                                                                                                                                                                                    |
|                                                                                                 | 1.2.Stevens-Johnson syndrome (SJS) and Toxic epidermal necrolysis (TEN)                                                                                                                                                                                                        |
|                                                                                                 | 1.3.Necrotizing fasciitis                                                                                                                                                                                                                                                      |
|                                                                                                 | 1.4.Toxic shock syndrome (TSS)                                                                                                                                                                                                                                                 |
|                                                                                                 | 1.5.Staphylococcal scalded skin syndrome (SSSS), or Ritter's Disease                                                                                                                                                                                                           |
|                                                                                                 | 1.6.Meningococemia                                                                                                                                                                                                                                                             |
|                                                                                                 | 1.7.Rocky Mountain spotted fever                                                                                                                                                                                                                                               |
|                                                                                                 | 1.8.Exfoliative erythroderma                                                                                                                                                                                                                                                   |
|                                                                                                 | 1.9.Generalized pustular psoriasis (GPP)                                                                                                                                                                                                                                       |
| <b>Group 2.</b><br><br><b>DMs associated with adverse drug reactions.</b>                       | <p>Most DISRs are presented as mild dermatitis and self-resolving as maculopapular rash, urticaria, angioedema, and erythema multiforme. Less commonly, it is life-threatening patterns that include erythroderma, Stevens–Johnson syndrome and toxic epidermal necrolysis</p> |

**Group 3.  
DMs associated  
with systemic  
diseases.**

- |       |                                                                           |
|-------|---------------------------------------------------------------------------|
| 3.1.  | <u>Seborrheic Dermatitis</u>                                              |
| 3.2.  | <u>Erythema Multiforme</u>                                                |
| 3.3.  | <u>Vitiligo</u>                                                           |
| 3.4.  | <u>Erythema Nodosum</u>                                                   |
| 3.5.  | <u>Cutaneous metastases</u>                                               |
| 3.6.  | <u>Paget's Disease</u>                                                    |
| 3.7.  | <u>Acanthosis nigricans</u>                                               |
| 3.8.  | <u>Sweet's Syndrome (Acute febrile neutrophilic dermatosis)</u>           |
| 3.9.  | <u>Amyloidosis of the skin</u>                                            |
| 3.10. | <u>Erythema Gyrratum Repens</u>                                           |
| 3.11. | <u>Cyanosis</u>                                                           |
| 3.12. | <u>Clubbing</u>                                                           |
| 3.13. | <u>Necrolytic Migratory Erythema (glucagonoma syndrome)</u>               |
| 3.14. | <u>Cutaneous leukocytoclastic vasculitis</u>                              |
| 3.15. | <u>Lichen planus</u>                                                      |
| 3.16. | <u>Necrolytic acral erythema</u>                                          |
| 3.17. | <u>Hereditary Hemorrhagic Telangiectasia (Osler-Weber-Rendu syndrome)</u> |
| 3.18. | <u>Pyoderma Gangrenosum</u>                                               |
| 3.19. | <u>Nephrogenic Systemic Fibrosis</u>                                      |
| 3.20. | <u>Diabetes Mellitus-Related Skin Conditions</u>                          |

|                                                                          |                                                                                            |
|--------------------------------------------------------------------------|--------------------------------------------------------------------------------------------|
|                                                                          |                                                                                            |
| <b>Group 4.<br/>DMs as a<br/>consequence of<br/>the critical illness</b> | <b>4.1.    <u>Dermatological disorders of infectious origin</u></b>                        |
|                                                                          | <b>4.2.    <u>Dermatological disorders induced by vasopressor drugs</u></b>                |
|                                                                          | <b>4.3.    <u>pressure sores</u></b>                                                       |
|                                                                          | <b>4.4.    <u>Traumatic lesions due to invasive ICU procedures.</u></b>                    |
|                                                                          | <b>4.5.    <u>Contact Dermatitis</u></b>                                                   |
|                                                                          | <b>4.6.    <u>Skin Necrosis associated with Disseminated Intravascular Coagulation</u></b> |
